# Supplementary material for: Ecotoxicity of Polyvinylidene Difluoride (PVDF) and Polylactic Acid (PLA) Microplastics in Marine Zooplankton
Source: MDPI journal article supplement (doi:10.3390/toxics10080479), 2022-08-17
Supplement: s1 [file s1]

# Ecotoxicity of Polyvinylidene Difluoride (PVDF) and Polylactic Acid (PLA) Microplastics in Marine Zooplankton

Michela Di Giannantonio <sup>1,\*</sup>, Chiara Gambardella <sup>2,\*</sup>, Roberta Miroglio <sup>2</sup>, Elisa Costa <sup>2</sup>, Francesca Sbrana <sup>3,4</sup>, Marco Smerieri <sup>5</sup>, Giovanni Carraro <sup>5</sup>, Roberto Utzeri <sup>6</sup>, Marco Faimali <sup>2</sup> and Francesca Garaventa <sup>1</sup>

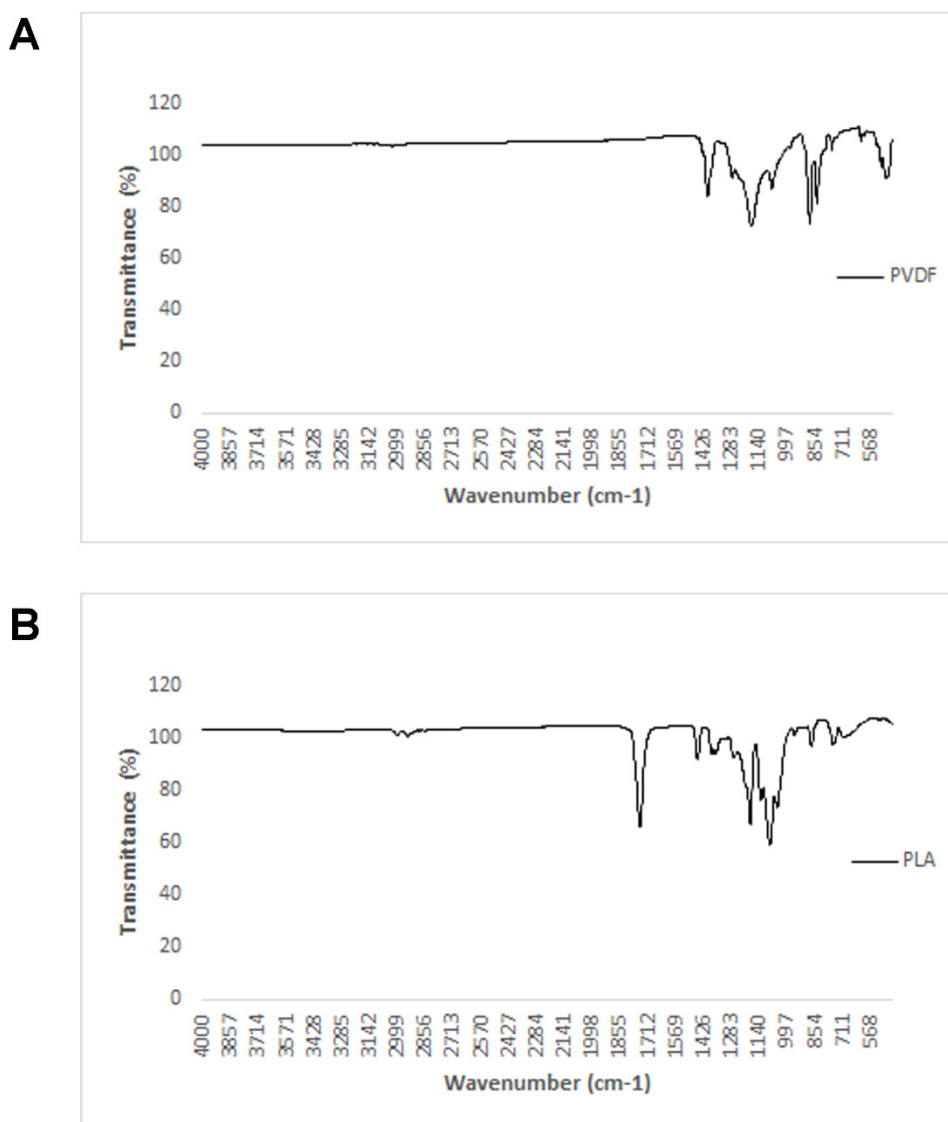

**Figure S1.** FTIR spectrum of PVDF (A) and PLA (B). Video S1: 3D section of jellyfish ephyrae with PVDF MPs (stained with Nile red—red fluorescence) inside the gelatinous tissue (stained in yellow), among the nematocysts (depicted in green). Video S2: 3D section of jellyfish ephyrae with PLA MPs (stained with Nile red—red fluorescence) inside the gelatinous tissue (stained in yellow), among the nematocysts (depicted in green).
